# Supplementary material for: A heterogeneous response of liver and skeletal muscle fat to the combination of a Paleolithic diet and exercise in obese individuals with type 2 diabetes: a randomised controlled trial
Source: Springer Nature journal article supplement (doi:10.1007/s00125-018-4618-y), 2018-04-25
Supplement: MOESM1 [file 15719268]

## ESM Methods

**Liver fat, and fat in the tibialis anterior/soleus muscle** Participants were instructed to avoid physical exercise for 48 h prior to examination. The proportions of fat in the liver, and soleus and tibialis anterior muscle were determined using proton magnetic resonance spectroscopy (<sup>1</sup>H-MRS) with a Discovery MR750 3.0T GE scanner. Liver scans were performed using an 8-element cardiac coil, and calf muscle scans were performed using a quadrature knee coil. The liver spectroscopic volume was placed in the right lobe of the liver. For liver measurements, respiratory-triggered magnetic resonance spectra were acquired with the point-resolved spectroscopy sequence, using a repetition time (TR) of two respiratory intervals (at least 4500 ms), and an echo time (TE) of 28 ms. For the calf muscles (soleus and tibialis anterior), spectra were acquired with a 5000-ms TR and a 28-ms TE. For each spectrum, 64 signal averages were acquired from a volume element of 20 × 20 × 20 mm<sup>3</sup>. A total of 1024 data points were acquired over a 2000-Hz spectral width. In each case, two spectra were acquired: one with and one without pre-saturation of the water resonance. All MR spectra were processed and analyzed using the software package LCModel version 6.2-1P by S. W. Provencher. Lipid content was calculated as the sum of the lipid methylene resonances at 1.3 ppm and 1.6 ppm. The LCModel concentration table of lipid spectra reports liver fat concentrations as resonance areas divided by the unsuppressed water resonance area; thus, the lipid/water ratios were converted to percent lipid content using the following formula: lipid content (%) = 100 \* lipid / (lipid + water) [1]. IMCL is measured as mM of CH<sub>2</sub> groups and normalised by creatine concentration of the muscle.

**Gene expression** After an overnight fast a needle biopsy of superficial subcutaneous adipose tissue was taken under local anesthesia from the lower abdomen. Adipose tissue was immediately frozen in liquid nitrogen and stored at -80 °C. Total RNA was extracted from subcutaneous adipose tissue biopsies using RNeasy<sup>®</sup> Lipid Tissue Mini kit (Qiagen, GmbH, Hilden, Germany) and RNA was reversed transcribed using TaqMan<sup>®</sup> reverse transcription reagents (Applied Biosystems, Foster City, CA, USA) as previously described [2] Relative quantification real-time PCR was performed on ABI Prism<sup>®</sup> 7000 Sequence Detection System (Applied Biosystems, Foster City, CA, USA) using Universal PCR Master Mix 2X (Roche Molecular Systems) and TaqMan gene expression assays (Applied Biosystems) for *TNFα* (Hs00174128\_m1), *IL-6* (Hs00985639\_m1) and *LRP10* (Hs00204094\_m1). Reference genes was evaluated by comparing *PPIA* (Hs999999904\_m1) and *LRP1019* on the study cohort using the NormFinder algorithm and *LRP10* appeared to be the most suitable gene and accordingly expression levels of the target genes were normalized to *LRP10*.

**ESM Table 1** Results of the intervention without the three outliers of the Paleolithic diet + Exercise group that increase liver fat

|                            | Paleolithic diet<br>(n=13) | Paleolithic diet + Exercise group<br>(n=10, without outliers) | Outlier 1 | Outlier 2 | Outlier 3 |
|----------------------------|----------------------------|---------------------------------------------------------------|-----------|-----------|-----------|
| Liver fat, %               |                            |                                                               |           |           |           |
| Baseline                   | 20 (14 – 28)               | 13 (6 – 21)                                                   | 11        | 11        | 26        |
| Change 0–12 weeks          | –13 (–17, –9)**            | –7 (–12, –3)*                                                 | 10        | 6         | 7         |
| Soleus muscle IMCL         |                            |                                                               |           |           |           |
| Baseline                   | 19 (13 – 24)               | 13 (8 – 32)                                                   | 31        | 26        | 33        |
| Change 0–12 weeks          | –9 (–12, –3)**             | –2 (–3, 2)††                                                  | –7        | –7        | –20       |
| Age, years                 | 60 (54 – 64)               | 61 (58 – 67)                                                  | 61        | 66        | 58        |
| Diabetes duration, years   | 3 (2 – 6)                  | 3 (1 – 7)                                                     | 1         | 8         | 8         |
| VO <sub>2</sub> max, L/min |                            |                                                               |           |           |           |
| Baseline                   | 2.2 (2.0 – 2.6)            | 2.2 (1.7 – 3.0)                                               | 1.9       | 1.6       | 2.8       |
| Change 0–12 weeks          | –0.1 (–0.1, –0.3)*         | 0.1 (0.0, 0.4)*† †                                            | 0.2       | 0.2       | 0         |
| Body weight, kg            |                            |                                                               |           |           |           |
| Baseline                   | 90.0 (83.3 – 103.2)        | 97 (79 – 105)                                                 | 84        | 84        | 126       |
| Change 0–12 weeks          | –7.1 (–9.8, –5.6)***       | –7 (–9, –6)**                                                 | –5        | –8        | –14       |
| BMI, kg/m <sup>2</sup>     |                            |                                                               |           |           |           |
| Baseline                   | 31.4 (29.4 – 33.7)         | 31.4 (28.6 – 32.9)                                            | 37.2      | 29.1      | 38.5      |
| Change 0–12 weeks          | –2.4 (–3.1, –1.8)***       | –2.3 (–3.0, –2.0)**                                           | –2.2      | –2.8      | –4.2      |
| Fat mass, kg               |                            |                                                               |           |           |           |
| Baseline                   | 34.4 (30.1, 37.9)          | 32.6 (28.9, 36.3)                                             | 35.8      | 37.3      | 42.7      |
| Change 0–12 weeks          | –5.7 (–8.2, –4.0)***       | –6.0 (–8.6, –5.2)**                                           | –3.8      | –6.9      | –10.1     |
| HbA1c, mmol/mol            |                            |                                                               |           |           |           |
| Baseline                   | 55 (48 – 58)               | 55 (49 – 58)                                                  | 52        | 57        | 71        |
| Change 0–12 weeks          | –11 (–15, –5)**            | –9 (–16, –5)*                                                 | –11       | –19       | –32       |
| HbA1c, %                   |                            |                                                               |           |           |           |
| Baseline                   | 7.2 (6.5 – 7.5)            | 7.2 (6.6 – 7.5)                                               | 6.9       | 7.4       | 8.6       |
| Change 0–12 weeks          | –1.0 (–1.4, –0.5)**        | –0.9 (–1.5, –0.5)*                                            | –1.0      | –1.8      | –2.9      |
| Fasting P-glucose, mmol/l  |                            |                                                               |           |           |           |
| Baseline                   | 8.0 (6.9 – 8.5)            | 8.5 (7.5 – 10.1)                                              | 8.2       | 12.3      | 10.4      |
| Change 0–12 weeks          | –0.9 (–1.8, –0.1)*         | –1.2 (–2.3, –0.8)*                                            | –2.0      | –4.4      | –4.0      |

|                                               |                        |                                  |       |       |       |
|-----------------------------------------------|------------------------|----------------------------------|-------|-------|-------|
| P-triacylglycerols, mmol/l                    |                        |                                  |       |       |       |
| Baseline                                      | 2.4 (1.4 – 3.1)        | 1.7 (1.1 – 2.2)                  | 1.0   | 0.9   | 3.6   |
| Change 0–12 weeks                             | –0.6 (–1.8, –0.2)*     | –0.5 (–0.9, –0.2)**              | 0.0   | –0.2  | –2.5  |
| P-NEFA, mmol/l                                |                        |                                  |       |       |       |
| Baseline                                      | 0.60 (0.53 – 0.78)     | 0.85 (0.65 – 0.93)               | 0.68  | 0.81  | 0.64  |
| Change 0–12 weeks                             | 0.03 (–0.02, 0.20)     | –0.02 (–0.10, 0.15)              | –0.09 | 0.32  | –0.14 |
| P-AST, $\mu$ kat/l                            |                        |                                  |       |       |       |
| Baseline                                      | 0.59 (0.53 – 0.71)     | 0.53 (0.50 – 0.65)               | 0.95  | 0.51  | 0.63  |
| Change 0–12 weeks                             | –0.05 (–0.14, 0.14)    | 0.06 (–0.11, 0.27)               | –0.28 | 0.00  | –0.25 |
| P-ALT, $\mu$ kat/l                            |                        |                                  |       |       |       |
| Baseline                                      | 0.67 (0.53 – 0.91)     | 0.51 (0.46 – 0.69)               | 1.63  | 0.49  | 0.67  |
| Change 0–12 weeks                             | –0.12 (–0.34, –0.08)** | –0.01 (–0.13, 0.11) <sup>†</sup> | –0.67 | –0.06 | –0.23 |
| Plasma fetuin-A, $\mu$ g/ml                   |                        |                                  |       |       |       |
| Baseline                                      | 455 (414 – 558)        | 423 (370 – 560)                  | 433   | 128   | 416   |
| Change 0–12 weeks                             | –44 (–87, –3)*         | –5 (–80, 7)                      | 57    | 264   | 73    |
| Energy intake, kJ/day                         |                        |                                  |       |       |       |
| Baseline                                      | 8330 (6204 – 10778)    | 6517 (5477 – 8037)               |       | 9615  | 11389 |
| Change 0–12 weeks                             | –1377 (–3284, –1025)** | –2155 (–2766, –531)**            |       | –3644 | –657  |
| Total energy expenditure, kJ/day              |                        |                                  |       |       |       |
| Baseline                                      | 12619 (11129 – 13933)  | 12519 (11355 – 16539)            | 9627  | 8761  | 17364 |
| Change 0–12 weeks                             | –954 (–1485, –285)*    | –1305 (–2360, 611)               |       | 1201  | –5259 |
| Resting energy expenditure, kJ/day            |                        |                                  |       |       |       |
| Baseline                                      | 6791 (6184 – 7243)     | 7272 (5653 – 7904)               | 5561  | 5565  | 10109 |
| Change 0–12 weeks                             | –510 (–774, –188)**    | –364 (–699, –38)*                |       | –540  | –2192 |
| Physical activity energy expenditure, kJ/day  |                        |                                  |       |       |       |
| Baseline                                      | 4276 (3615 – 5519)     | 4874 (3728 – 7544)               | 3192  | 2402  | 5678  |
| Change 0–12 weeks                             | –117 (–870, 372)       | –644 (–1623, 1678)               | 791   | 1632  | –2586 |
| Protein, g/day                                |                        |                                  |       |       |       |
| Baseline                                      | 80 (69 – 95)           | 73 (58 – 92)                     |       | 108   | 136   |
| Change 0–12 weeks                             | 5 (–17, 23)            | 1 (–14, 12)                      |       | –29   | 15    |
| Protein, g kg <sup>–1</sup> day <sup>–1</sup> |                        |                                  |       |       |       |
| Baseline                                      | 0.85 (0.66 – 1.14)     | 0.75 (0.73 – 0.84)               |       | 1.29  | 1.08  |

|                                    |                    |                    |       |      |
|------------------------------------|--------------------|--------------------|-------|------|
| Change 0–12 weeks                  | 0.10 (−0.09, 0.35) | 0.06 (−0.10, 0.23) | −0.25 | 0.26 |
| Carbohydrate, g/day                |                    |                    |       |      |
| Baseline                           | 204 (148 – 280)    | 161 (148 – 186)    | 186   | 303  |
| Change 0–12 weeks                  | −89 (−122, −49)**  | −84 (−117, −62)**  | −115  | −117 |
| Total fat, g/day                   |                    |                    |       |      |
| Baseline                           | 84 (58 – 115)      | 58 (44 – 78)       | 118   | 98   |
| Change 0–12 weeks                  | −12 (−38, 8)       | −10 (−30, 20)      | −35   | 31   |
| Saturated fatty acids, g/day       |                    |                    |       |      |
| Baseline                           | 31 (21 – 48)       | 23 (19 – 29)       | 48    | 36   |
| Change 0–12 weeks                  | −14 (−33, −5)**    | −11 (−19, −5)**    | −25   | −11  |
| Monounsaturated fatty acids, g/day |                    |                    |       |      |
| Baseline                           | 32 (25 – 41)       | 21 (15 – 31) †     | 44    | 37   |
| Change 0–12 weeks                  | 4 (−16, 14)        | 5 (−7, 17)         | −4    | 33   |
| Polyunsaturated fatty acids, g/day |                    |                    |       |      |
| Baseline                           | 11 (9 – 14)        | 8 (6 – 12)         | 18    | 16   |
| Change 0–12 weeks                  | 1 (−5, 5)          | 1 (−4, 7)          | −3    | 8    |
| Protein, E%                        |                    |                    |       |      |
| Baseline                           | 17 (14 – 19)       | 18 (16 – 21)       | 19    | 20   |
| Change 0–12 weeks                  | 7 (4, 11)**        | 7 (4, 14)**        | 3     | 4    |
| Carbohydrate, E%                   |                    |                    |       |      |
| Baseline                           | 41 (38 – 46)       | 47 (31 – 49)       | 32    | 45   |
| Change 0–12 weeks                  | −10 (−18, −3)*     | −13 (−22, −6)**    | −13   | −16  |
| Total fat, E%                      |                    |                    |       |      |
| Baseline                           | 40 (36 – 41)       | 32 (30 – 40)       | 46    | 33   |
| Change 0–12 weeks                  | 6 (−6, 11)         | 8 (0, 15)          | 6     | 13   |
| Saturated fatty acids, E%          |                    |                    |       |      |
| Baseline                           | 15 (13 – 18)       | 13 (11 – 16)       | 19    | 12   |
| Change 0–12 weeks                  | −5 (−8, −3)**      | −4 (−9, −1)**      | −4    | −3   |
| Monounsaturated fatty acids, E%    |                    |                    |       |      |
| Baseline                           | 16 (14 – 17)       | 12 (10 – 16)       | 17    | 12   |
| Change 0–12 weeks                  | 5 (−3, 11)         | 10 (3, 12)*        | 8     | 12   |
| Polyunsaturated fatty acids, E%    |                    |                    |       |      |

|                                                                                |                     |                      |       |       |       |
|--------------------------------------------------------------------------------|---------------------|----------------------|-------|-------|-------|
| Baseline                                                                       | 5.0 (4.7 – 6.4)     | 5.1 (3.7 – 6.4)      |       | 7     | 5     |
| Change 0–12 weeks                                                              | 2.1 (–0.5, 3.6)*    | 3.3 (0.1, 3.9)*      |       | 3     | 3     |
| Rate of disappearance, mg kg <sup>-1</sup> min <sup>-1</sup>                   |                     |                      |       |       |       |
| Baseline                                                                       | 3.79 (2.95 – 4.23)  | 3.9 (2.9 – 5.5)      | 4.1   | 3.9   | 3.2   |
| Change 0–12 weeks                                                              | 2.05 (0.32, 3.59)*  | 1.0 (0.5, 3.1)*      | 0.8   | 2.8   | 2.2   |
| Rate of disappearance/insulin, µg kg <sup>-1</sup> min <sup>-1</sup> per mIU/l |                     |                      |       |       |       |
| Baseline                                                                       | 34.2 (28.6 – 49.2)  | 51.7 (33.1 – 75.8)   | 35.1  | 61.4  | 46.2  |
| Change 0–12 weeks                                                              | 28.9 (11.8, 61.5)** | 12.2 (0.4, 25.2)*    | 14.6  | 27.1  | 33.5  |
| Endogenous glucose production, mg kg <sup>-1</sup> min <sup>-1</sup>           |                     |                      |       |       |       |
| Baseline                                                                       | 1.81 (1.56 – 1.99)  | 1.78 (1.50 – 2.69)   | 1.48  | 1.92  | 1.91  |
| Change 0–12 weeks                                                              | 0.04 (–0.06, 0.55)  | 0.19 (–0.33, 0.70)   | 0.11  | –0.24 | –0.06 |
| Suppression of endogenous glucose production, %                                |                     |                      |       |       |       |
| Baseline                                                                       | 96 (83 – 128)       | 100 (85 – 131)       | 36    | 114   | 116   |
| Change 0–12 weeks                                                              | 13 (–10, 44)        | 14 (–43, 34)         | 0     | –25   | 96    |
| Suppression of endogenous glucose production/insulin, % per mIU/l              |                     |                      |       |       |       |
| Baseline                                                                       | 0.98 (0.77 – 1.36)  | 1.39 (1.04 – 1.72)   | 0.31  | 1.81  | 1.67  |
| Change 0–12 weeks                                                              | 0.22 (–0.03, 0.91)* | –0.02 (–0.44, 0.44)  | 0.06  | –0.63 | 1.43  |
| Suppression of NEFA, %                                                         |                     |                      |       |       |       |
| Baseline                                                                       | 88 (80 – 93)        | 89 (85 – 93)         | 92    | 93    | 69    |
| Change 0–12 weeks                                                              | 3.4 (1.3, 5.7)*     | 3.5 (0.2, 6.4)*      | 0     | 2     | 21    |
| Suppression of NEFA/insulin, % per mIU/l                                       |                     |                      |       |       |       |
| Baseline                                                                       | 0.83 (0.74 – 1.08)  | 1.13 (1.01 – 1.26) † | 0.78  | 1.47  | 0.99  |
| Change 0–12 weeks                                                              | 0.14 (0.03, 0.31)** | 0.09 (–0.03, 0.19)   | 0.14  | –0.22 | 0.33  |
| P-CRP, nmol/l                                                                  |                     |                      |       |       |       |
| Baseline                                                                       | 11 (6 – 27)         | 13 (6 – 24)          | 15    | 15    | 6     |
| Change 0–12 weeks                                                              | –2 (–9, 1)          | –3 (–10, 0)*         | –5    | –7    | 0     |
| <i>IL6</i> in s.c. adipose tissue, relative expression of mRNA                 |                     |                      |       |       |       |
| Baseline                                                                       | 0.81 (0.42 – 1.16)  | 0.78 (0.52 – 1.08)   | 0.82  | 3.93  | 0.82  |
| Change 0–12 weeks                                                              | 0.15 (–0.45, 0.62)  | –0.13 (–0.30, –0.01) | 0.09  | –3.42 | –0.46 |
| <i>TNFα</i> in s.c. adipose tissue, relative expression of mRNA                |                     |                      |       |       |       |
| Baseline                                                                       | 2.19 (1.79 – 3.03)  | 2.26 (1.75 – 3.34)   | 3.75  | 3.88  | 2.45  |
| Change 0–12 weeks                                                              | –0.06 (–0.53, 0.35) | –0.61 (–0.92, 1.04)  | –2.05 | 0.18  | –1.12 |

Data are reported as median (interquartile range) and individuals results for three subjects. \* $p < 0.05$ , \*\* $p < 0.01$ , \*\*\* $p < 0.001$  for the within-group change over time from baseline to 12 weeks. † $p < 0.05$ , †† $p < 0.01$  between the Paleolithic diet group and the Paleolithic diet + Exercise group minus 3 outliers. Abbreviations: P-ALT, Plasma-Alanine aminotransferase. P-AST, Plasma-Aspartate aminotransferase. P-CRP, Plasma-C-reactive protein. E%, energy percent. IMCL, intramyocellular lipids. P-NEFA, Plasma-non-esterified fatty acids.

## References

1. Ryysy L, Hakkinen AM, Goto T, et al. (2000) Hepatic fat content and insulin action on free fatty acids and glucose metabolism rather than insulin absorption are associated with insulin requirements during insulin therapy in type 2 diabetic patients. *Diabetes* 49: 749-758
2. Alvehus M, Simonyte K, Andersson T, et al. (2012) Adipose tissue IL-8 is increased in normal weight women after menopause and reduced after gastric bypass surgery in obese women. *Clin Endocrinol (Oxf)* 77: 684-690
